## CASE REPORTS

be avoided. Vasodilators such as nitroglycerin (and perhaps volatile anesthetics) may be contraindicated. Although a segmental intramural coronary artery can be managed with supraarterial myotomy or coronary bypass,<sup>8-10</sup> management of total intramural coronary arteries as in the current case has not been described.

The authors thank Professor Akira Okuaki and Associate Professor Choichiro Tase in the Department of Anesthesiology, Fukushima Medical College, Fukushima, Japan, for reviewing the manuscript.

## References

1. Faruqi AMA, Maloy WC, Felner JM, Schlant RC, Logan WD, Symbas P: Symptomatic myocardial bridging of coronary artery. *Am J Cardiol* 1978; 41:1305-10
2. Morales AR, Romanelli R, Boucek RJ: The mural left anterior descending coronary artery, strenuous exercise and sudden death. *Circulation* 1980; 62:230-7
3. Furniss SS, Williams DO, McGregor GA: Systolic coronary occlusion due to myocardial bridging: A rare cause of ischemia. *Int J Cardiol* 1990; 26:116-7
4. Angelini P, Trivellato M, Donis J, Leachman RD: Myocardial bridging: A review. *Prog Cardiovasc Dis* 1983; 26:75-88
5. Ishimori T, Raizner AE, Chahine RA, Awdeh M, Luchi RJ: Myocardial bridges in man: Clinical correlations and angiographic accentuation with nitroglycerin. *Cathet Cardiovasc Diagn* 1977; 3:59-65
6. Noble J, Bourassa MG, Petitclerc R, Dyrda I: Myocardial bridging and milking effect of the left anterior descending coronary artery: Normal variant or obstruction? *Am J Cardiol* 1976; 37:993-9
7. Rossi L, Dander B, Nidasio GP, Arbustini E, Paris B, Vassanelli C, Buonanno C, Poppi A: Myocardial bridges and ischemic heart disease. *Eur Heart J* 1980; 1:239-45
8. Grondin P, Bourassa MG, Noble J, Petitclerc R, Dyrda I: Successful course after supraarterial myotomy for myocardial bridging and milking effect of the left anterior descending artery. *Ann Thorac Surg* 1977; 24:422-9
9. Betriu A, Tubau J, Sanz G, Margina J, Navarro-Lopez F: Relief of angina by periarterial muscle resection of myocardial bridges. *Am Heart J* 1980; 100:223-6
10. Marshall ME, Headley RN: Intramural coronary artery as a cause of unstable angina pectoris. *South Med J* 1978; 71:1304-6
11. Morales AR, Romanelli R, Tate LG, Boucek RJ, Marchena ED: Intramural left anterior descending coronary artery: Significance of the depth of the muscular tunnel. *Hum Pathol* 1993; 24:693-701
12. Virmani R, Farb A, Burke A: Ischemia from myocardial coronary bridging: Fact or fancy? *Hum Pathol* 1993; 24:687-8
13. Ahmad M, Merry SL, Haibach H: Evidence of impaired myocardial perfusion and abnormal left ventricular function during exercise in patients with isolated systolic narrowing of the left anterior descending coronary artery. *Am J Cardiol* 1981; 48:832-6
14. Hill RC, Chitwood WR Jr, Bashore TM, Sink JD, Cox JL, Wechsler AS: Coronary flow and regional function before and after supraarterial myotomy for myocardial bridging. *Ann Thorac Surg* 1981; 31:176-81

Anesthesiology  
1997; 87:429-32  
© 1997 American Society of Anesthesiologists, Inc.  
Lippincott-Raven Publishers

## Fatal Pulmonary Embolism during Liver Transplantation

Michael Sopher, M.D.,\* Michelle Braunfeld, M.D.,\* Christopher Shackleton, M.D.,† Ronald W. Busuttill, M.D., Ph.D.,‡  
Susheela Sangwan, M.D.,\* Marie Csete, M.D.§

\* Associate Professor, Department of Anesthesiology, University of California Los Angeles.

† Associate Professor, Department of Surgery, University of California Los Angeles.

‡ Professor, Department of Surgery, University of California Los Angeles.

§ Associate Professor, Department of Anesthesiology, University of California Irvine.

Received from the University of California Los Angeles School of Medicine, Los Angeles, California. Submitted for publication October 11, 1996. Accepted for publication March 24, 1997.

Address reprint requests to Dr. Csete: Caltech Biology, Mail Code 156-29, Pasadena, California 91125. Address electronic mail to: csete@starbase1.caltech.edu

Key words: aprotinin, epsilon-amino caproic acid, pulmonary embolus, liver transplantation.

FATAL pulmonary embolism is a very rare intraoperative complication of orthotopic liver transplantation (OLT), despite the use of antifibrinolytic agents in cirrhotic patients prone to hyperfibrinolysis in the setting of clotting activation and thrombin generation.<sup>1</sup> We report two such fatal complications to which aprotinin may have contributed.

## Case Reports

## Case 1

The patient was a 38-yr-old man with Laennec's cirrhosis and hepatitis C. Eight months before transplantation he presented with esophageal variceal bleeding and spontaneous bacterial peritonitis. He became progressively encephalopathic and short of breath and was admitted to the hospital. Laboratory studies included hematocrit,

## CASE REPORTS

21%; leukocyte count,  $18.5 \times 10^3/\text{mm}^3$ ; platelet count,  $103,000/\text{mm}^3$ ; and prothrombin time (PT) 16.3 s (INR, 1.6). The patient was hyponatremic, hyperkalemic, and oliguric, with creatinine level of 4.6 mg/dl, and required hemodialysis. Thoracentesis and paracentesis revealed negative bacterial cultures. He was treated with ciprofloxacin, and his leukocyte count fell to  $9.4 \times 10^3/\text{mm}^3$ .

The patient underwent an uncomplicated rapid sequence induction of anesthesia, after which a radial arterial catheter and two 9-French introducers were placed in the right internal jugular vein. Anesthesia was maintained with isoflurane and fentanyl, and dopamine was infused at  $3 \mu\text{g} \cdot \text{kg}^{-1} \cdot \text{min}^{-1}$ . The first hemodynamics recorded (before incision) were pulmonary artery (PA) pressure of 23/10 mmHg; CVP, 10 mmHg; and cardiac output (CO), 9.8 l/min. On  $\text{FiO}_2$  of 0.6, first arterial blood gas (ABG) analysis revealed pH, 7.34;  $\text{Pa}_{\text{CO}_2}$ , 35 mmHg;  $\text{Pa}_{\text{O}_2}$ , 109 mmHg; base deficit, -5.7. Hct was 25%; PT, 19.1 s; and fibrinogen, 135 mg/dl. TEG is not used in our center. Before incision, 1 g/h infusion of  $\epsilon$ -aminocaproic acid (EACA) was started after a 5-g bolus. Thirty minutes after incision, the patient experienced acute hypotension (systolic blood pressure, 65 mmHg) associated with rapid blood loss, which responded quickly to transfusion with 2 U packed red cells, 4 U fresh frozen plasma (FFP), 250 cc 5% albumin, and administration of  $\text{CaCl}_2$  (500 mg) and phenylephrine (400  $\mu\text{g}$ ). After this episode, blood pressure was 130/75 mmHg, and PA was 41/23 mmHg; CVP, 14 mmHg; and CO, 12.7 l/min. The patient was hemodynamically stable through the rest of the dissection phase. Venovenous bypass with a heat exchanger and nonheparinized tubing was instituted without problems (flows, 2.1–2.5 l/min). Thirty minutes later, after hepatectomy, the surgeons noted extremely poor hemostasis and requested that aprotinin be given. The EACA infusion was discontinued, and after a test dose of aprotinin (10,000 KIU), the patient received a loading dose of 2 million KIU, followed by infusion of 200,000 KIU/h. Blood gas level a few minutes later ( $\text{FiO}_2$  0.45) was pH, 7.4;  $\text{Pa}_{\text{CO}_2}$ , 28 mmHg;  $\text{Pa}_{\text{O}_2}$ , 218 mmHg, Hct, 25%; platelets,  $37,000/\text{mm}^3$ ; PT, 16 s, and fibrinogen 154 mg/dl. Venous anastomoses were completed, and portal bypass was discontinued. Approximately 20 min after aprotinin was first given, the patient's blood pressure dropped acutely to 45/20 mmHg. Dopamine was increased to  $10 \mu\text{g} \cdot \text{kg}^{-1} \cdot \text{min}^{-1}$ , and boluses of epinephrine, neosynephrine,  $\text{CaCl}_2$ , sodium bicarbonate, and intravenous fluids were given with only transient improvement in blood pressure. PA pressures were also noted to be elevated to 50/29 mmHg, CVP to 29 mmHg, and CO could not be measured. End-tidal  $\text{CO}_2$  dropped, and ABG on  $\text{FiO}_2$  1.0 was pH, 7.49;  $\text{Pa}_{\text{CO}_2}$ , 27 mmHg;  $\text{Pa}_{\text{O}_2}$ , 47 mmHg, base deficit, -1.7. Venovenous bypass was discontinued, and the aprotinin infusion stopped. Large doses of pressors were administered without improvement.

A transesophageal echocardiographic (TEE) probe was placed and revealed a large right atrium and ventricle, with a large thrombus in the right atrium, through the tricuspid valve, and into the right ventricle. The right ventricle was severely hypocontractile, and the left ventricle appeared empty but normally contractile. Despite pharmacologic interventions, blood pressure continued to fall, and chest compression was begun, followed by direct myocardial compression for several minutes. One hour into the resuscitation, ABG on  $\text{FiO}_2$  1.0 was pH, 7.12;  $\text{Pa}_{\text{CO}_2}$ , 33 mmHg;  $\text{Pa}_{\text{O}_2}$ , 75 mmHg; base deficit, -16.5. Systolic blood pressure never increased above 45 mmHg. The new liver was grafted and reperfused without any improvement in the patient's blood pressure. Cardiac surgeons were called and removed a large thrombus from the right

atrium and pulmonary artery, without bypass. Nonetheless, the patient died 2 h after the onset of hypotension.

### Case 2

A 37-yr-old man with subacute hepatic failure of unknown cause presented 1 month before transplantation with fever, weakness, nausea, and vomiting. Hematocrit was 32%, platelets,  $289,000/\text{mm}^3$ ; glucose, 57 mg/dl; creatinine, 1.4 mg/dl; albumin, 2.0 g/dl; and total bilirubin, 27.7 mg/dl. PT was 19.2 s; aspartate aminotransferase, 556 U/l; and alanine aminotransferase, 321 U/l—all significantly higher than 1 month previous. The patient's hospital course was significant for septic arthritis of the knee and bacteremia, managed with multiple antibiotics, and for spontaneous bacterial peritonitis. The patient's renal function deteriorated, and he was transferred to University of California, Los Angeles. He required hemodialysis, which was complicated by hypotension. Dopamine was administered for 8 days in dosages ranging from 3.5 to  $7.5 \mu\text{g} \cdot \text{kg}^{-1} \cdot \text{min}^{-1}$ . Dobutamine stress echo showed an ejection fraction of 55–60%.

The patient underwent an uncomplicated liver transplantation, during which 10 U packed cells, 17 U FFP, 20 U platelets, and 10 U of cryoprecipitate were given. He received aprotinin (2 million KIU bolus, 500,000 KIU/h) from the dissection phase through the end of surgery. The postoperative course was complicated by renal failure requiring dialysis and poor graft function. Two days later, the patient underwent a second liver transplantation for primary nonfunction.

After induction of anesthesia, aprotinin was administered in the same dose as for the first transplantation. Dissection and institution of venovenous bypass were uncomplicated. After hepatectomy, the patient developed acute systemic hypotension, and PA pressures rose suddenly to 40/30 mmHg. The surgeons noted a poorly contracting right ventricle (compared with normal hyperdynamic contractions), and PA pressures remained increased. The hypotension was unresponsive to dopamine,  $8 \mu\text{g} \cdot \text{kg}^{-1} \cdot \text{min}^{-1}$ , atropine given when the heart rate fell to 45 beats/min, and boluses of epinephrine. For these reasons, TEE was placed. A large thrombus was seen in the inferior vena cava and right atrium. Cardiac surgery consultants elected to remove the thrombus, and the patient was placed on cardiopulmonary bypass with heparin anticoagulation. Cardiomyotomy was performed, and large clots (some appearing fibrinous and likely to be days old, some appearing newly formed or gelatinous) were removed from the inferior vena cava, right atrium and ventricle, and pulmonary artery. After cardiopulmonary bypass, the patient required large doses of epinephrine, and then norepinephrine, to maintain blood pressure. The liver graft was placed without improvement in the pressor requirement. Hemostasis in the neohepatic phase was poor despite administration of cryoprecipitate, FFP, and 100 mg of protamine. New thrombus was noted on TEE in the RA and RV and attached to the PA catheter, and so, further protamine and antifibrinolytics were not given (despite partial thromboplastin time [PTT] > 180 s). Cardiac surgeons did not believe a second procedure was indicated. The patient received 36 U each of packed cells and FFP. The patient was transported to the intensive care unit on a norepinephrine infusion ( $2 \mu\text{g} \cdot \text{kg}^{-1} \cdot \text{min}^{-1}$ ). He never regained consciousness and was declared brain dead on the second postoperative day.

### Discussion

The two cases presented here occurred within 1 month of each other, at a time just after the introduction

## CASE REPORTS

of aprotinin into clinical use during OLT; 15 patients before these received aprotinin during OLT. Before this time, the standard antifibrinolytic regimen during OLT at our center was EACA, given to more than 600 patients without evidence of abnormal clot formation. The proximity of these cases in our center is striking and should motivate reevaluation of antifibrinolytic therapy during liver transplantation.

Liver transplantation centers vary in their practice of administration of procoagulant drugs. EACA is probably the most commonly administered antifibrinolytic drug in the United States for patients undergoing OLT. A combination of release of tissue plasminogen activator (t-PA) from graft endothelium and decreased hepatic clearance of t-PA generally is accepted as one contributor to enhanced fibrinolysis during liver transplantation.<sup>2</sup> Thus, EACA is used during liver transplantation for its effect of interfering with plasmin(ogen) binding to fibrin. Almost a decade ago, the drug was reported to reverse thromboelastographic evidence of fibrinolysis without causing thrombotic complications during liver transplantation.<sup>3</sup> Although EACA was not rigorously, prospectively studied, such reports influenced clinical practice tremendously. A prospective study on EACA was reported at a national meeting<sup>4</sup> and greatly influenced our local practice. In this blinded study, transfusion requirements were significantly decreased when EACA was given to patients undergoing liver transplantation (5-g bolus, then 1-g/h infusion). This study caused our center to standardize the administration and dose of EACA.

Several reports from outside the United States suggested that the antifibrinolytic drug, aprotinin, was effective in reducing transfusion requirements during OLT. A 50% reduction in transfusion requirements was reported when aprotinin (2 million KIU bolus, then 500,000 KIU/h infusion) was given during liver transplantation.<sup>5</sup> However, this study was small and used retrospective control subjects. Similar problems plague other reports,<sup>6-9</sup> and further, drug dose is not standardized from report to report.<sup>10,11</sup> Recent studies have helped elucidate some of the mechanisms of aprotinin action during liver transplantation, such as its antikallikrein effect,<sup>12</sup> but the number of patients prospectively studied against either placebo or EACA has not been large. Nonetheless, aprotinin is used routinely in many European liver transplantation centers, and some authors report that they will not study the drug with a control arm because withholding aprotinin would be

unethical.<sup>13</sup> Not all studies support a role for aprotinin in reducing transfusion requirements during OLT.<sup>14</sup>

One case report increased concern that aprotinin contributed to a fatal pulmonary embolism during OLT.<sup>15</sup> This patient (after receiving a bolus of aprotinin 1.6 million KIU and an infusion at 0.5 million KIU/h) developed a large thrombus attached to the pulmonary artery catheter, spanning the superior vena cava into the pulmonary artery. The authors suggested that the complication may have been a result of very low antithrombin III levels and of two introducers in the internal jugular vein leading to endothelial activation. Further, in a report of six perioperative liver transplantation deaths attributed to pulmonary platelet aggregates, three of the six patients received aprotinin, and two of these died during surgery.<sup>16</sup>

Rare cases of pulmonary embolism during OLT have been reported before the use of aprotinin.<sup>17-19</sup> Another report increased concern that EACA may contribute to rare pulmonary embolism.<sup>20</sup> Two of 12 patients who had received EACA experienced massive thromboembolism during transplantation. Of note, both patients were critically ill and intubated before surgery.

In the two cases reported here, several factors may have contributed to abnormal clot formation. The first patient received EACA followed by aprotinin, and it is possible that the drugs had a synergistic action on clot formation. The second patient was septic in the weeks before transplantation. If he had ongoing infection, disseminated intravascular coagulation (DIC) may have contributed to clot formation. In addition, patients with acute liver disease may be more prone to DIC than those with chronic disease.<sup>21</sup> Drug dosage may be a factor. A recent prospective study of aprotinin suggests that much lower dosages (0.2 million KIU/h infusion without a bolus) than originally reported may be sufficient to decrease fibrinolytic activity during liver transplantation,<sup>22</sup> increasing concern that high-dose aprotinin may be an unnecessary risk. The timing of the second transplantation may have placed the second patient at risk for clotting complications because there may be a relative abundance of procoagulants (such as plasminogen activator inhibitor) and slow recovery of protein C and S several days after OLT.<sup>23</sup>

In summary, the complicated coagulopathy in liver disease combined with an equally complex superimposed coagulopathy during surgery are inherently difficult to study. For example, there often is insufficient clinical information to clearly distinguish between primary and secondary fibrinolysis in these patients. Large

prospective trials to determine optimal antifibrinolytic therapy are needed to determine minimal effective doses and to carefully document the balance between thrombogenic factors and antifibrinolytic parameters after drug administration. In experienced transplantation centers, aggressive transfusion therapy of coagulopathy combined with potent procoagulant drugs may lead to increased thrombotic complications. These cases highlight the need for a reevaluation of procoagulant therapy during liver transplantation.

The authors thank Dr. Hillel Laks for his contributions.

## References

1. Violi F, Ferro D, Basili S, Saliola M, Quintarelli C, Alessandri C, Cordova C: Association between low-grade disseminated intravascular coagulation and endotoxemia in patients with liver cirrhosis. *Gastroenterology* 1995; 109:531-9
2. Porte RJ, Bontempo FA, Knot EAR, Lewis JH, Kang YG, Starzl TE: Systemic effects of tissue plasminogen activator-associated fibrinolysis and its relation to thrombin generation in orthotopic liver transplantation. *Transplantation* 1989; 47:978-84
3. Kang Y, Lewis HJ, Navalgund A, Russell MW, Bontempo FA, Niren LS, Starzl TE: Epsilon-aminocaproic acid for treatment of fibrinolysis during liver transplantation. *ANESTHESIOLOGY* 1987; 66:766-73
4. Pohorecki R, Landers DF, Peters RK, et al: Effect of epsilon-aminocaproic acid on blood product usage during orthotopic liver transplantation: A double blind, prospective study. Presented at American Society of Transplant Surgeons, May 1992, Houston, Texas.
5. Grosse H, Lobbes W, Framback M, von Broen O, Ringe B, Barthels M: The use of high dose aprotinin in liver transplantation: The influence of fibrinolysis and blood loss. *Thrombosis Res* 1991; 63:287-97
6. Patrassi GM, Viero M, Sartori MT, De Silvestro G, Rossaro L, Burra P, Nollì ML, Piccinni P, Bassi N: Aprotinin efficacy on intraoperative bleeding and transfusion requirements in orthotopic liver transplantation. *Transfusion* 1994; 34:507-11
7. Smith O, Hazlehurst G, Brozovic B, Rolles K, Burroughs A, Mallett S, Dawson K, Mehta A: Impact of aprotinin on blood transfusion requirements in liver transplantation. *Transfusion Med* 1993; 3:97-102
8. Gerlach H, Rossaint R, Slama K, Streich R, Keitel M, Blumhardt G, Bechstein W, Lemmens P, Lohmann R, Heuhaus P: No requirement for cryoprecipitate or platelet transfusion during liver transplantation. *Transplant Proc* 1993; 25:1813-6
9. Scudamore CH, Randall RE, Jewesson PJ, Shackleton CR, Salvian AJ, Fagan M, Frighetto L, Growe GH, Scarth I, Erb SR: Aprotinin reduces the need for blood products during liver transplantation. *Am J Surg* 1995; 169:546-9
10. Himmelreich G, Muser M, Neuhaus P, Bechstein WO, Slama KJ, Jochum M, Riess H: Different aprotinin applications influencing hemostatic changes in orthotopic liver transplantation. *Transplantation* 1992; 53:132-6
11. Soilleux H, Gillon MC, Mirand A, Daibes M, Leballe F, Ecoffey C: Comparative effects of small and large aprotinin doses on bleeding during orthotopic liver transplantation. *Anesth Analg* 1995; 80:349-52
12. Segal HC, Hunt BJ, Cottam S, Beard C, Francis JL, Potter D, Tan KC: Changes in the contact system during orthotopic liver transplantation with and without aprotinin. *Transplantation* 1995; 59:366-70
13. Himmelreich G, Jochum M, Bechstein WO, Machleidt W, Neuhaus P, Slama KJ, Riess H: Mediators of leukocyte activation play a role in disseminated intravascular coagulation during orthotopic liver transplantation. *Transplantation* 1994; 57:354-8
14. Garcia L, Sabate A, Domenech P, Martinez Brotons F, Drudis R, Jaurrieta E: Aprotinin in orthotopic liver transplantation. *Transplant Proc* 1995; 27:2290-1
15. Baubillier E, Cherqui D, Dominique C, Khalil M, Bonnet F, Fagniez PL, Duvaldestin P: A fatal thrombotic complication during liver transplantation after aprotinin administration. *Transplantation* 1994; 57:1664-6
16. Sandey EA, Crow J, Mallett SV, Alcock RJ, More L, Burroughs AK, Rolles K: Pulmonary platelet aggregates: Possible cause of sudden perioperative death in adults undergoing liver transplantation. *J Clin Pathol* 1993; 46:222-7
17. Navalgund AA, Kang Y, Sarnar JB, Jahr JS, Gieraerts R: Massive pulmonary thromboembolism during liver transplantation. *Anesth Analg* 1988; 67:400-2
18. Farrell FJ, Nguyen M, Woodley S, Imperial JC, Garcia-Kennedy R, Man K, Esquivel CO, Keeffe EB: Outcome of liver transplantation in patients with hemochromatosis. *Hepatology* 1994; 20:404-10
19. Ellis JE, Lichtor JL, Feinstein SB, Chung MR, Polk SL, Broelsch C, Emond J, Thistlethwaite JR, Roizen MF: Right heart dysfunction, pulmonary embolism, and paradoxical embolization during liver transplantation. A transesophageal two-dimensional study. *Anesth Analg* 1989; 68:777-82
20. Prah GN, Lisman SR, Maslow AD, Freeman RB, Rohrer RJ: Transesophageal echocardiography reveals an unusual cause of hemodynamic collapse during orthotopic liver transplantation—Two case reports. *Transplantation* 1995; 59:921-5
21. Langley PG, Hughes RD, Forbes A, Keays R, Williams R: Controlled trial of antithrombin III supplementation in fulminant hepatic failure. *J Hepatology* 1993; 17:326-31
22. Marcel RJ, Stegall WC, Suit CT, Arnold JC, Vera RL, Ramsay MA, O'Donnell MB, Swygert TH, Hein HA, Whitten CW: Continuous small-dose aprotinin controls fibrinolysis during orthotopic liver transplantation. *Anesth Analg* 1996; 82:1122-5
23. Velasco R, Villalba R, Fernandez M, de la Mata M, Roman J, Rubio V, Rufian S, Varo E, Pera C, Torres A: Diminished anticoagulant and fibrinolytic activity following liver transplantation. *Transplantation* 1992; 53:1256-61
